# Supplementary material for: Niche Analysis and Conservation of Bird Species Using Urban Core Areas
Source: MDPI journal article supplement (doi:10.3390/su13116327), 2021-06-02
Supplement: s1 [file s1]

Article

# Niche Analysis and Conservation of Bird Species Using Urban Core Areas

Vasilios Liordos <sup>1,\*</sup>, Jukka Jokimäki <sup>2</sup>, Marja-Liisa Kaisanlahti-Jokimäki <sup>2</sup>, Evangelos Valsamidis <sup>1</sup> and Vasileios J. Kotsiotis <sup>1</sup>

<sup>1</sup> Department of Forest and Natural Environment Sciences, International Hellenic University, P.O. Box 172, 66100-GR, Drama, Greece; vagvals@yahoo.gr (E.V.); kotsiotisv@yahoo.gr (K.V.)

<sup>2</sup> Arctic Centre, University of Lapland, P.O. Box 122, 96101-FI Rovaniemi, Finland; jukka.jokimaki@ulapland.fi (J.J.); marja-liisa.kaisanlahti@ulapland.fi (M.-L.K.-J.)

\* Correspondence: liordos@for.ihu.gr

**Table S1.** Common and scientific names, total abundance (sum of individuals in all survey stations) and incidence (number of stations a species was observed) of the bird species recorded in more than 5% of the survey stations in the green spaces of Kavala (26 species) and Rovaniemi (15 species).

| Species                                                              | Kavala ( <i>n</i> = 19) |           | Rovaniemi ( <i>n</i> = 19) |           |
|----------------------------------------------------------------------|-------------------------|-----------|----------------------------|-----------|
|                                                                      | Total abundance         | Incidence | Total abundance            | Incidence |
| Black-headed Gull ( <i>Chroicocephalus ridibundus</i> ) <sup>1</sup> | –                       | –         | 5                          | 2         |
| Feral Pigeon ( <i>Columba livia</i> )                                | 96                      | 10        | –                          | –         |
| Collared Dove ( <i>Streptopelia decaocto</i> )                       | 90                      | 17        | –                          | –         |
| Common Cuckoo ( <i>Cuculus canorus</i> )                             | 3                       | 3         | –                          | –         |
| European Bee-eater ( <i>Merops apiaster</i> )                        | 10                      | 2         | –                          | –         |
| Syrian Woodpecker ( <i>Dendrocopos syriacus</i> )                    | 9                       | 4         | –                          | –         |
| Northern House Martin ( <i>Delichon urbica</i> ) <sup>a</sup>        | 260                     | 18        | –                          | –         |
| Barn Swallow ( <i>Hirundo rustica</i> ) <sup>b</sup>                 | 147                     | 9         | –                          | –         |
| White Wagtail ( <i>Motacilla alba</i> ) <sup>2</sup>                 | 5                       | 2         | 5                          | 5         |
| Eurasian Blackbird ( <i>Turdus merula</i> )                          | 16                      | 6         | –                          | –         |
| Fieldfare ( <i>Turdus pilaris</i> )                                  | –                       | –         | 19                         | 13        |
| Sardinian Warbler ( <i>Sylvia melanocephala</i> )                    | 12                      | 5         | –                          | –         |
| Willow Warbler ( <i>Phylloscopus trochilus</i> ) <sup>b</sup>        | 5                       | 3         | 5                          | 5         |
| Olivaceous Warbler ( <i>Iduna pallida</i> )                          | 4                       | 2         | –                          | –         |
| Common Nightingale ( <i>Luscinia megarhynchos</i> )                  | 20                      | 7         | –                          | –         |
| Great Tit ( <i>Parus major</i> )                                     | 29                      | 13        | 7                          | 7         |
| Eurasian Blue Tit ( <i>Cyanistes caeruleus</i> )                     | 12                      | 4         | 5                          | 5         |
| Eurasian Magpie ( <i>Pica pica</i> ) <sup>2</sup>                    | 5                       | 2         | 2                          | 2         |
| Eurasian Jay ( <i>Garrulus glandarius</i> )                          | 7                       | 3         | –                          | –         |
| Western Jackdaw ( <i>Corvus monedula</i> )                           | 30                      | 6         | 10                         | 6         |
| Hooded Crow ( <i>Corvus cornix</i> )                                 | 31                      | 13        | 4                          | 4         |
| Common Starling ( <i>Sturnus vulgaris</i> ) <sup>b</sup>             | 38                      | 8         | –                          | –         |
| House Sparrow ( <i>Passer domesticus</i> ) <sup>b3</sup>             | 188                     | 17        | 21                         | 11        |
| Eurasian Tree Sparrow ( <i>Passer montanus</i> ) <sup>b</sup>        | 30                      | 2         | 8                          | 6         |
| Common Chaffinch ( <i>Fringilla coelebs</i> )                        | 39                      | 11        | 11                         | 8         |
| European Goldfinch ( <i>Carduelis carduelis</i> )                    | 42                      | 13        | –                          | –         |
| European Greenfinch ( <i>Chloris chloris</i> ) <sup>3</sup>          | 36                      | 14        | 4                          | 4         |
| Redpoll ( <i>Acanthis flammea</i> )                                  | –                       | –         | 3                          | 3         |
| European Serin ( <i>Serinus serinus</i> )                            | 4                       | 2         | –                          | –         |
| Eurasian Siskin ( <i>Spinus spinus</i> )                             | –                       | –         | 9                          | 9         |

<sup>1</sup> Vulnerable; <sup>2</sup> Near threatened; <sup>3</sup> Endangered; IUCN red list categories in Finland, assigned by the Red List of Finnish Species [71]. Species recorded in Greece have not been evaluated by the Red Data Book of Threatened Animals of Greece [72].

<sup>a</sup> SPEC 2: species whose global populations are concentrated in Europe but have an unfavorable conservation status within Europe (Species of European Conservation Concern; [70]).

<sup>b</sup> SPEC 3: species whose global populations are not concentrated in Europe but have an unfavorable conservation status within Europe (Species of European Conservation Concern; [70]).

**Table S2.** Environmental variables associated with the urban green spaces of Kavala and Rovaniemi.

| Environmental variables                    | Kavala ( <i>n</i> = 19) |            | Rovaniemi ( <i>n</i> = 19) |            |
|--------------------------------------------|-------------------------|------------|----------------------------|------------|
|                                            | Mean ± SD               | Min–max    | Mean ± SD                  | Min–max    |
| Tree cover (%)                             | 30.4 ± 17.6             | 10.0–71.9  | 26.6 ± 14.0                | 5.0–60.0   |
| Shrub cover (%)                            | 7.2 ± 5.6               | 0.0–14.8   | 3.8 ± 4.9                  | 0.0–20.0   |
| Bare ground cover (%)                      | 9.0 ± 6.3               | 0.0–19.9   | 53.3 ± 16.4                | 20.0–85.0  |
| Impervious cover (%)                       | 53.4 ± 16.8             | 8.3–73.9   | 16.3 ± 14.6                | 5.0–50.0   |
| Deciduous tree cover (%)                   | 19.3 ± 12.7             | 1.0–42.4   | 16.8 ± 12.6                | 4.0–40.0   |
| Coniferous tree cover (%)                  | 11.1 ± 20.7             | 0.0–69.9   | 11.5 ± 12.6                | 0.0–43.5   |
| Green space size (ha)                      | 1.5 ± 3.8               | 0.1–17.0   | 1.7 ± 1.9                  | 0.1–8.5    |
| Green space perimeter (km)                 | 0.6 ± 0.6               | 0.15–2.7   | 0.6 ± 0.3                  | 0.1–1.3    |
| Relative edge length (km/km <sup>2</sup> ) | 98.2 ± 55.5             | 16.0–273.6 | 54.3 ± 28.3                | 13.7–140.0 |
| Distance from city edge (km)               | 0.7 ± 0.3               | 0.1–1.     | 1.2 ± 0.5                  | 0.4–2.0    |
| Distance from city center (km)             | 1.5 ± 0.9               | 0.1–3.1    | 0.9 ± 0.7                  | 0.3–2.6    |
| Building height (floors/building)          | 2.9 ± 1.6               | 1–6        | 2.6 ± 1.2                  | 1–4        |
| Morning noise level (dBA)                  | 34.7 ± 3.2              | 28.1–40.7  | 40.0 ± 3.9                 | 33.1–49.1  |
| Midday noise level (dBA)                   | 48.2 ± 7.8              | 39.1–63.9  | 47.3 ± 5.5                 | 35.4–56.9  |
| Car traffic (cars/min)                     | 10.3 ± 11.3             | 0–35       | 9.2 ± 11.2                 | 0–43       |
| Pedestrian traffic (people/min)            | 5.4 ± 5.9               | 1.0–25.0   | 2.4 ± 2.0                  | 0–9        |
